# Supplementary material for: Discovery of a Hidden Trypanosoma cruzi Spermidine Synthase Binding Site and Inhibitors through In Silico, In Vitro, and X-ray Crystallography
Source: PubMed Central journal article supplement (PMC10373461; doi:10.1021/acsomega.3c01314), 2023-07-12
Supplement: ao3c01314_si_001.pdf [file ao3c01314_si_001.pdf]

SUPPORTING INFORMATION FOR

Discovery of a Hidden *Trypanosoma cruzi* Spermidine Synthase Binding Site and Inhibitors through *In Silico*, *In Vitro*, and X-ray Crystallography

Ryunosuke Yoshino,<sup>†,∇</sup> Nobuaki Yasuo,<sup>‡</sup> Yohsuke Hagiwara,<sup>¶,∇</sup> Takashi Ishida,<sup>§</sup>

Daniel Ken Inaoka,<sup>//,⊥</sup> Yasushi Amano,<sup>¶</sup> Yukihiro Tateishi,<sup>¶</sup> Kazuki Ohno,<sup>¶,∇,1</sup> Ichiji Namatame,<sup>¶</sup>  
Tatsuya Niimi,<sup>¶,2</sup> Masaya Orita,<sup>¶,3</sup> Kiyoshi Kita,<sup>//,⊥</sup> Yutaka Akiyama,<sup>§,∇</sup> and Masakazu Sekijima<sup>\*,§,∇</sup>

<sup>†</sup> Transborder Medical Research Center, University of Tsukuba, Tsukuba 305-8577, Japan

<sup>‡</sup> Tokyo Tech Academy for Convergence of Materials and Informatics (TAC-MI), Tokyo Institute of Technology, Meguro, Tokyo 152-8550, Japan

<sup>¶</sup> Medicinal Chemistry Research Labs, Drug Discovery Research, Astellas Pharma Inc, Miyukigaoka, Tsukuba 305-8585 Japan

<sup>§</sup> School of Computing, Tokyo Institute of Technology, Tokyo 152-8550, Japan

<sup>//</sup> School of Tropical Medicine and Global Health, Nagasaki University, Sakamoto, Nagasaki 852-8523, Japan

<sup>⊥</sup> Department of Biomedical Chemistry, Graduate School of Medicine, The University of Tokyo, Tokyo 113-0033, Japan

<sup>∇</sup> Education Academy of Computational Life Sciences (ACLS), Tokyo Institute of Technology, Yokohama 226-8501 Japan

E-mail: [sekijima@c.titech.ac.jp](mailto:sekijima@c.titech.ac.jp)

---

<sup>1</sup> Present affiliation: Modulus Discovery, Inc.

<sup>2</sup> Present affiliation: PeptiDream Inc.

<sup>3</sup> Present affiliation: Axcelead Drug Discovery Partners, Inc.

**Table S1.** Reference of amino acid residues for structure clustering

|        |                                                 |
|--------|-------------------------------------------------|
| Gln48  | N, CA, C, O, CB, CG, CD, OE1, NE2               |
| Leu50  | N, CA, C, O, CB, CG, CD1, CD2                   |
| Met65  | N, CA, C, O, CB, CG, SD, CE                     |
| Ala66  | N, CA, C, O, CB                                 |
| Leu67  | N, CA, C, O, CB, CG, CD1, CD2                   |
| Asp68  | N, CA, C, O, CB, CG, OD1, OD2                   |
| Cys70  | CA, C, O, CB, SG                                |
| Ile71  | N, CA, C, O, CB, CG1, CG2, CD1                  |
| Gln72  | N, CA, C, O, CB, CG, CD, OE1, NE2               |
| Val73  | N, CA, C, O, CB, CG1, CG2                       |
| Thr74  | N, CA, C, O, CB, OG1, CG2                       |
| Glu78  | N, CA, C, O, CB, CG, CD, OE1, OE2               |
| Val80  | N, CA, C, O, CB, CG1, CG2                       |
| Tyr81  | N, CA, C, O, CB, CG, CD1, CD2, CE1, CE2, CZ, OH |
| His82  | N, CA, C, O, CB, CG, ND1, CD2, CE1, NE2         |
| Val84  | N, CA, C, O, CB, CG1, CG2                       |
| Leu85  | N, CA, C, O, CB, CG, CD1, CD2                   |
| Gly86  | N, CA, C, O                                     |
| Ile101 | N, CA, C, O, CB, CG1, CG2, CD1                  |
| Ile102 | N, CA, C, O, CB, CG1, CG2, CD1                  |
| Gly103 | N, CA, C, O                                     |
| Gly104 | N, CA, C, O                                     |
| Gly105 | N, CA, C, O                                     |
| Asp106 | N, CA, C, O, CB, CG, OD1, OD2                   |
| Gly107 | N, CA, C, O                                     |
| Gly108 | N, CA, C, O                                     |
| Val109 | N, CA, C, O, CB, CG1, CG2                       |
| Leu110 | N, CA, C, O, CB, CG, CD1, CD2                   |
| Leu124 | N, CA, C, O, CB, CG, CD1, CD2                   |
| Val125 | N, CA, C, O, CB, CG1, CG2                       |
| Asp126 | N, CA, C, O, CB, CG, OD1, OD2                   |
| Ile127 | N, CA, C, O, CB, CG1, CG2, CD1                  |
| Asp128 | N, CA, C, O, CB, CG, OD1, OD2                   |
| Val131 | N, CA, C, O, CB, CG1, CG2                       |
| Met132 | N, CA, C, O, CB, CG, SD, CE                     |

|        |                                                 |
|--------|-------------------------------------------------|
| Ser135 | N, CA, C, O, CB, OG                             |
| Ile142 | N, CA, C, O, CB, CG1, CG2, CD1                  |
| Gly158 | N, CA, C, O                                     |
| Ile174 | N, CA, C, O, CB, CG1, CG2, CD1                  |
| Ile175 | N, CA, C, O, CB, CG1, CG2, CD1                  |
| Asp176 | N, CA, C, O, CB, CG, OD1, OD2                   |
| Thr177 | N, CA, C, O, CB, OG1, CG2                       |
| Thr178 | N, CA, C, O, CB, OG1, OG2                       |
| Phe188 | N, CA, C, O, CB, CG, CD1, CD2, CE1, CE2, CZ     |
| Phe192 | N, CA, C, O, CB, CG, CD1, CD2, CE1, CE2, CZ     |
| Tyr193 | N, CA, C, O, CB, CG, CD1, CD2, CE1, CE2, CZ, OH |
| Cys207 | N, CA, C, O, CB, SG                             |
| Asn208 | N, CA, C, O, CB, CG, OD1, ND2                   |
| Gln209 | N, CA, C, O, CB, CG, CD, OE1, NE2               |
| Gly210 | N, CA, C, O                                     |
| Glu211 | N, CA, C, O, CB, CG, CD, OE1, OE2               |
| Ser212 | N, CA, C, O, CB, OG                             |
| Met223 | N, CA, C, O, CB, CG, SD, CE                     |
| Met240 | N, CA, C, O, CB, CG, SD, CE                     |
| Val242 | N, CA, C, O, CB, CG1, CG2                       |
| Thr244 | N, CA, C, O, CB, OG1, CG2                       |
| Tyr245 | N, CA, C, O, CB, CG, CD1, CD2, CE1, CE2, CZ, OH |
| Pro246 | N, CA, C, O, CB, CG, CD                         |
| Thr252 | N, CA, C, O, CB, OG1, CG2                       |
| Leu253 | N, CA, C, O, CB, CG, CD1, CD2                   |

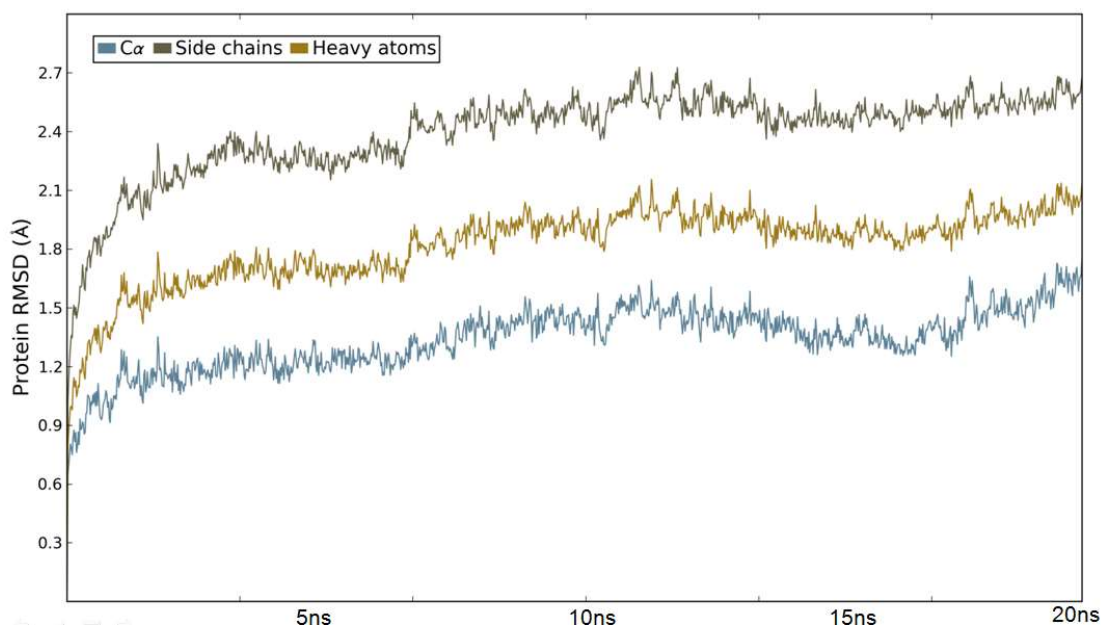

**Figure S1.** Root-mean-square deviations (RMSD) in the MD simulations. Blue:  $\alpha$ -carbon, gray: side chains, yellow: heavy atoms.

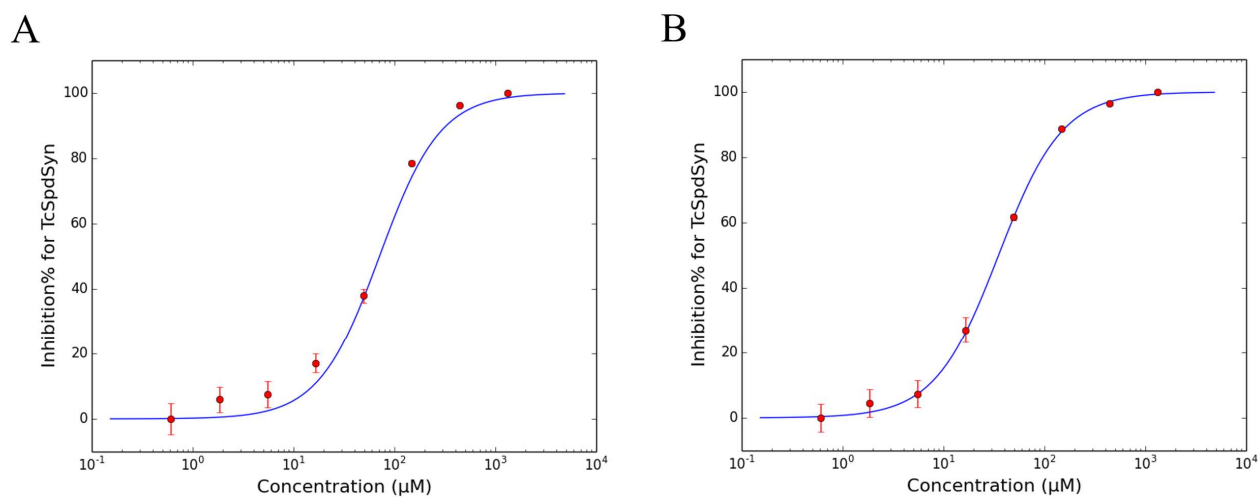

**Figure S2.** The fitting curves for the calculation of the  $IC_{50}$  values in Table 1 (A: compound **1**, B: compound **2**). The error bars represent the standard error of the % inhibition measured at each dose.

**Table S2.** Crystallography data for the TcSpdSyn–1 and TcSpdSyn–2 complexes.

| Data collection           |                         | Refinement                                          |             |
|---------------------------|-------------------------|-----------------------------------------------------|-------------|
| Space group               | <i>P</i> 2 <sub>1</sub> | no. of reflections                                  | 57047       |
| <i>a, b, c</i> (Å)        | 43.8, 99.7, 134.3       | <i>R</i> <sub>work</sub> / <i>R</i> <sub>free</sub> | 0.261/0.292 |
| <i>α, β, γ</i> (deg)      | 90.0, 91.6, 90.0        | no. of atoms (protein)                              | 8649        |
| Resolution (Å)            | 2.17                    | no. of atoms (water)                                | 91          |
| <i>R</i> <sub>merge</sub> | 0.077                   | RMSD                                                |             |
| <i>I</i> / <i>σI</i>      | 16.8                    | bond lengths (Å)                                    | 0.011       |
| Completeness (%)          | 94.2                    | bond angles (deg)                                   | 1.626       |
| Redundancy                | 1.7                     | PDB ID                                              | 5Y4P        |

  

| Data collection           |                         | Refinement                                          |             |
|---------------------------|-------------------------|-----------------------------------------------------|-------------|
| Space group               | <i>P</i> 2 <sub>1</sub> | No. of reflections                                  | 66426       |
| <i>a, b, c</i> (Å)        | 44.0, 99.7, 134.5       | <i>R</i> <sub>work</sub> / <i>R</i> <sub>free</sub> | 0.224/0.250 |
| <i>α, β, γ</i> (deg)      | 90.0, 92.0, 90.0        | No. of atoms (protein)                              | 8661        |
| Resolution (Å)            | 2.07                    | No. of atoms (water)                                | 158         |
| <i>R</i> <sub>merge</sub> | 0.089                   | RMSD                                                |             |
| <i>I</i> / <i>σI</i>      | 20.2                    | bond lengths (Å)                                    | 0.018       |
| Completeness (%)          | 98.2                    | bond angles (deg)                                   | 2.131       |
| Redundancy                | 1.8                     | PDB ID                                              | 5Y4Q        |

**Table S3.** SMILES of inactive compounds.

| No. | SMILES                                                |
|-----|-------------------------------------------------------|
| 3   | <chem>Cc1[nH]c2c(Cl)cccc2c1CCN</chem>                 |
| 4   | <chem>Cc1[nH]c2ccc(Cl)cc2c1CCN</chem>                 |
| 5   | <chem>Cc1[nH]c2ccc([N+](=O)[O-])cc2c1CCN</chem>       |
| 6   | <chem>NCc1cc(Cl)c(OCc2ccccc2)c(Cl)c1</chem>           |
| 7   | <chem>CC(C(=O)O)N1C(=O)NC2NC(=O)NC21</chem>           |
| 8   | <chem>Nc1ccc2c(c1)CC(=O)N2</chem>                     |
| 9   | <chem>Oc1cccc2c1CCCC2O</chem>                         |
| 10  | <chem>N#CCc1c[nH]c2ccccc12</chem>                     |
| 11  | <chem>Oc1ccc2c(O)cccc2c1</chem>                       |
| 12  | <chem>Nc1cc(C(=O)O)ccc1O</chem>                       |
| 13  | <chem>NCCc1cccc(F)c1</chem>                           |
| 14  | <chem>NC1c2ccccc2CC1O</chem>                          |
| 15  | <chem>O=C(c1cnn(-c2ccccc2)c1)c1cc(F)ccc1O</chem>      |
| 16  | <chem>CC(C)(O)c1cn2ccccc2n1</chem>                    |
| 17  | <chem>OC(c1nc2ccccc2[nH]1)C(O)c1nc2ccccc2[nH]1</chem> |
| 18  | <chem>Cc1cc2nc(O)c(O)nc2cc1C</chem>                   |
| 19  | <chem>O=c1[nH]c2ccccc2cc1CO</chem>                    |
| 20  | <chem>CC(O)c1nc2ccccc2[nH]1</chem>                    |
| 21  | <chem>Cn1ccc(C(N)=O)c1N</chem>                        |
| 22  | <chem>Nc1ccc(S(N)(=O)=O)cc1N</chem>                   |

23 NCCNS(=O)(=O)c1cccc1  
 24 NS(=O)(=O)c1ccc2c(c1)NC(=O)CO2  
 25 Cc1cc2cc(CN)ccc2[nH]1  
 26 O=C(O)C1=NN(c2nc3cccc3[nH]2)C(=O)CC1  
 27 NCc1nnc2ccc(C(F)(F)F)cn12  
 28 CCn1c(=O)[nH]c2cccc21  
 29 NC(=O)c1c(O)cccc1O  
 30 Oc1ccc2cccc(O)c2n1  
 31 NC(=O)c1cccc1C(N)=O  
 32 OC(CNC1CCCCC1)c1cccc1  
 33 Nc1ncnc(O)c1[N+](=O)[O-]  
 34 COc1ccc2[nH]c(CN)cc2c1  
 35 Cc1cc(NCCN)c2cccc2n1  
 36 NC(=O)C1CCN(CC(O)c2cccc2)CC1  
 37 N=C(Nc1cccc(NC(=N)c2cccnc2)n1)c1cccnc1  
 38 O=c1ccc2cccc2[nH]1  
 39 O=C(O)c1ccc2nc(O)c(O)nc2c1  
 40 Cc1ccc(OCCSc2nc3c(N)ncnc3[nH]2)cc1C  
 41 O=C(O)COc1ccc(C=Cc2n[nH]c(-c3cccc3O)n2)cc1  
 42 Cc1cc(O)nc2nc(O)ccc12  
 43 OC(CNCCNc1nccc(C(F)(F)F)n1)COc1cccc1  
 44 NC(=O)CNC1CC(=O)N(c2ccc(Br)cc2)C1=O  
 45 N=C1NC2(O)C(=O)c3cccc3C2(O)N1  
 46 Cc1cc(C)c2[nH]c(=O)c(=O)[nH]c2c1  
 47 O=C(CSc1nc2cccc2[nH]1)Nc1cccc(O)c1  
 48 Cn1c2c(c(=O)n(C)c1=O)CN(CCN1CCNCC1)CN2  
 49 NC(=O)c1nn(Cc2cccc(F)c2)cc1[N+](=O)[O-]  
 50 O=C1NC(Cc2c[nH]c3cccc23)C(=O)N2CCCC12  
 51 CC(=O)N1CCC(N)=N1  
 52 O=C(NN=Cc1ccc(O)cc1O)C1CC1c1cccc1  
 53 O=C(NN=Cc1ccc(O)cc1O)C1C2CCCCC21  
 54 Cn1nc(CN)c2cccc2c1=O  
 55 N#CC(=C(O)c1cccc1)c1nc2cccc2[nH]1  
 56 NC(=O)C(Cc1cccc1)N1CC(=O)NC(=O)C1  
 57 CC1OC(Nc2cccc([N+](=O)[O-])c2)C(O)C(O)C1O  
 58 Cc1sc2ncnc(NN=Cc3cccc3O)c2c1C  
 59 Nc1nc(-c2cccc2O)nc(-c2cccc2O)n1  
 60 CCN1C(=O)CC(NCCc2ccc(S(N)(=O)=O)cc2)C1=O  
 61 CC(=O)NC(c1cccc1)c1c(O)ccc2ccc(O)cc12  
 62 Cn1c(=O)c2[nH]c(NN)nc2n(C)c1=O  
 63 NC(=S)Cc1c[nH]c2cccc12  
 64 O=C(CSc1nc2cccnc2[nH]1)Nc1ccc(F)cc1  
 65 Cc1cc(C)nc(NC(=N)N2CCC(C(N)=O)CC2)n1  
 66 CCN1C(=O)NC2NC(=O)N(CC)C21  
 67 NC(=O)c1sc2c(c1N)C(c1cccc1)CC(=O)N2  
 68 NC(=O)CN1C(=O)C(O)(CC(=O)c2cccc(N)c2)c2cccc21  
 69 Cc1ccnc(Nc2nc(-c3ccc(O)cc3O)cs2)c1

70 CC1CC(C)CN(Cc2nc(N)nc(Nc3ccccc3)n2)C1  
 71 COc1ccc(Nc2nc(-c3ccccc3O)cs2)cc1  
 72 O=C(CC1Nc2ccccc2NC1=O)NCCc1ccccc1  
 73 O=C(NCCc1c[nH]c2ccccc12)c1ccccc1  
 74 Nc1nc(G=Cc2ccccc2)nc(-c2ccccc2O)n1  
 75 Cc1cccc(NCc2nnc(SCC(N)=O)n2-c2ccccc2)c1  
 76 CC1=C(C(N)=O)C(c2cccnc2)n2ncnc2N1  
 77 N=c1oc2ccccc2cc1-c1nc2ccccc2[nH]1  
 78 NCCNS(=O)(=O)c1ccc(Cl)cc1  
 79 N=C(N)C1CN(Cc2ccncc2)C(=O)NC1=O  
 80 CC(C(N)=O)n1cncn1  
 81 C(=NCCN=Cc1cccs1)c1cccs1  
 82 Oc1nc2ccccc2nc1F  
 83 O=C(CN1CCCCC1)Nc1ccc2cn[nH]c2c1  
 84 CC(=O)N1c2ccccc2NC(=O)C1CC(=O)Nc1cccc([N+](=O)[O-])c1  
 85 CC(=O)c1cccc(NC(=O)Nc2ccccc2C(N)=O)c1  
 86 O=C(NN=C1CCN(Cc2ccccc2)CC1)C(O)c1ccccc1  
 87 Cn1c2c(c(=O)n(C)c1=O)CN(Cc1ccc(F)cc1)CN2  
 88 CC1(C)OC(C(N)=O)C(C(N)=O)O1  
 89 OC(CNCC(O)COc1ccccc1)COc1ccccc1  
 90 NS(=O)(=O)c1cccc(NC(=O)c2cccc(OCc3ccccc3)c2)c1  
 91 Nc1nenc2c1nnc2C1OC(CO)C(F)C1O  
 92 NS(=O)(=O)c1ccc(Cl)c(S(N)=O)c1  
 93 OC1CCCN(CC(O)c2ccccc2)C1  
 94 COc1ccc2nc(C)cc(N3CCC(C(N)=O)CC3)c2c1  
 95 CC(NCC(O)COc1cccc([N+](=O)[O-])c1)c1ccc(F)cc1  
 96 COc1ccc(C(=O)C(C#N)c2nc3ccccc3[nH]2)cc1[N+](=O)[O-]  
 97 CC(=O)c1cccc(OCC(O)CNCC(C)(C)CN(C)C)c1  
 98 CN1C(=O)c2ccccc2C1O  
 99 O=C(CC1OC(=O)c2ccccc21)Nc1nc2ccccc2[nH]1  
 100 N#CC1=C(N)OC2NN=C(C(F)(F)F)C2C1c1ccc(O)cc1  
 101 CC(=NOCC(=O)NN=Cc1ccc(C)cc1O)c1cccs1  
 102 Nc1ccccc1Nc1c(N)c(=O)oc2ccccc12  
 103 Nc1ncnc2c1nc(SCc1ccc3nsnc3c1)n2CC(O)CO  
 104 O=C(O)CN=Cc1ccc(O)cc1O  
 105 NC(=NOC(=O)c1ccoc1)c1ccc(Br)cc1  
 106 Cc1oc(C(N)=O)cc1COc1ccccc1C(N)=O  
 107 O=C(O)C(Cc1ccccc1)NCC(O)COc1ccccc1  
 108 O=C(O)C(Cc1c[nH]cn1)NCC(O)COc1ccccc1  
 109 O=C(O)C1Cc2c([nH]c3ccccc23)C(c2c[nH]c3ccccc23)N1  
 110 OC(CCNc1ccccc1)c1ccc(Cl)cc1  
 111 CC1=NN=C(S)SC1C  
 112 O=c1[nH]c(=O)n(C2CC(O)C(CO)O2)cc1Cl  
 113 CC(CCc1ccccc1)NCC(O)c1ccccc1  
 114 Nc1nc2cc3nc(O)c(O)nc3cc2s1  
 115 Cc1cc(=O)[nH]c(Nc2ccccc2O)n1  
 116 Cc1cc2[nH]c(=O)c(=O)[nH]c2cc1C

117 Nc1nc2[nH]c(SCc3ccccc3)nc2c(=O)[nH]1  
 118 O=C(O)C(Cc1c[nH]cn1)NC1CNN=C1c1ccccc1  
 119 COc1ccc2c(c1O)CN1CCC(=O)CC1C2O  
 120 CC1(C)OC2C(CO)OC(n3cnc4c(=O)[nH]cnc43)C2O1  
 121 CC(=O)c1ccc(OCC(O)CN2CCC(C(N)=O)CC2)cc1  
 122 NC(=O)C1CCN(CC(O)c2cccc([N+](=O)[O-])c2)CC1  
 123 O=C1NCCCCC1NCC(O)c1ccccc1  
 124 CC(=O)Cc1c[nH]c2ccccc12  
 125 Cn1ncc(C(N)=O)c1[N+](=O)[O-]  
 126 CC(=O)N1CSCC1C(=O)NNS(=O)(=O)c1ccccc1  
 127 OC(c1nc2cc(F)ccc2[nH]1)C(O)c1nc2cc(F)ccc2[nH]1  
 128 CC1=C(C(N)=O)C(c2ccc(O)cc2)n2nc(CCCO)nc2N1  
 129 CC1=C(C(N)=O)C(c2cccc(O)c2)n2nc(CCCO)nc2N1  
 130 N=c1ccn(CC(N)=O)c2ccccc12  
 131 NC(=O)CC(NC(=O)OCc1ccccc1)C(=O)OCc1ccccc1  
 132 O=C1NC2NC(=O)N(CCO)C2N1  
 133 Cc1ccc2[nH]c3c(c2c1)CCC3C#N  
 134 CN1C(=O)N(C)C2SC(N)=NNC21  
 135 CC(N)c1nnc(SCc2ccc(Cl)cc2)o1  
 136 Nc1nc(C=Cc2ccc(Cl)cc2)nc(-c2ccccc2O)n1  
 137 CN1CCN(c2nc(O)cc(CSc3nc4ccccc4s3)n2)CC1  
 138 COc1ccc2[nH]c(=O)c(=O)[nH]c2c1  
 139 O=C(CC1SC2=NCCN2C1=O)Nc1ccc(Cl)cc1  
 140 CC(=O)Nc1ccc(OCC(O)CNC2CCCC2)cc1  
 141 NS(=O)(=O)c1ccc(CCNc2ncnc3[nH]cnc23)cc1  
 142 NC(=O)NC(Cc1cccc(OCc2ccccc2)c1)C(=O)O  
 143 NCCc1c(F)cccc1F  
 144 CC(C)(C)NCC(O)c1ccc(O)c(CO)c1  
 145 Cc1nc(O)nc(O)c1C(N)=O  
 146 Oc1ccc(C=NNc2nc(O)cc(-c3ccccc3)n2)c(O)c1  
 147 CC1CC(NC(N)=O)NC(=O)N1  
 148 NC(=O)C1CCCCC1O  
 149 NC(=S)c1ccccc1O  
 150 NCC(C(=O)O)c1ccccc1  
 151 NC(=O)C(N)Cc1ccccc1  
 152 NC1CCc2ccccc2NC1=O  
 153 CC(N)c1nc2ccccc2n1C(F)F  
 154 Nc1nc(CN2CCCC2)nc(Nc2ccccc2)n1  
 155 Cc1[nH]nc(O)c1C1OC(=O)c2ccccc21  
 156 CN(C)c1ccc(CNCCc2c[nH]c3ccccc23)cc1  
 157 NC(=O)c1cc2ccccc2[nH]1  
 158 Fc1ccc(CNCC2CCNCC2)cc1  
 159 [O-][N+](=Cc1ccccc1)Cc1ccccc1  
 160 NN=C1C(=O)Nc2ccccc21  
 161 O=C(CCn1ccnc1)Nc1nc2ccccc2[nH]1  
 162 Cc1ccc(Nc2nc(N)nc(COC(=O)CN3CCCC3=O)n2)cc1  
 163 O=[N+](O)c1c(Nc2ccc3[nH]ncc3c2)nc2scn12



164 Cn1cc(C(N)=O)c(=O)[nH]c1=O  
 165 CN(C)C(CN)c1ccc(Cl)cc1  
 166 Nc1ccn(C2CC(O)C(CO)O2)c(=O)n1  
 167 CC(N)Cc1cccc(F)c1  
 168 NCc1cccc1-c1ccc(Cn2cncn2)cc1  
 169 Cc1cc(C)n(-c2cc(C(=N)N)ccn2)n1  
 170 NCc1cccc1N1CCCC(C(N)=O)C1  
 171 O=c1[nH]c(Nc2ccccc2O)nc2c1CCCC2  
 172 NC(=O)NC(CC(=O)Nc1ccc(F)cc1)c1cccc1  
 173 NC(CC1C(=O)Nc2ccccc21)C(=O)O  
 174 NC(=S)c1ccc[nH]1  
 175 N=C(N)c1ccnc(Oc2ccnc2)c1  
 176 O=C(O)C1CC(O)c2ccccc21  
 177 Cc1nc2cc(C3CCCN3C(=O)c3ccccc3)nn2c(O)c1C  
 178 CCN(Cc1cccc(Cl)c1)CC(O)Cn1cccn1  
 179 CC(NCC1CNc2ccnn2C1)c1ccc(F)c(Cl)c1  
 180 CNC(=O)C(N)Cc1c[nH]c2ccccc12  
 181 CC(C)C(N)c1nnc2n1N=C(c1ccc(Cl)cc1)CS2  
 182 CC(N)c1nnc(SCc2ccc(Cl)cc2Cl)o1  
 183 O=C(NCc1cccc1)NCC(O)c1cccc2ccccc12  
 184 CN1CCN(c2ccc(C(F)(F)F)cc2CN)CC1  
 185 FC1(F)CCNCC12CCN(Cc1ccccc1)C2  
 186 CC(N)Cc1ccc2c(c1)OCC2  
 187 CC1CCC(C(N)=O)CN1C(=O)c1cn(-c2ccccc2)nn1  
 188 [O-][n+]1ccc(NO)c2ccccc21  
 189 OCCN(Cc1cccc1)CC(O)COCc1cccc1  
 190 O=c1[nH]c2ccc(C(F)(F)F)cc2[nH]c1=O  
 191 Cc1c(CN2CCCC(O)C2)[nH]c2ccc(F)cc12

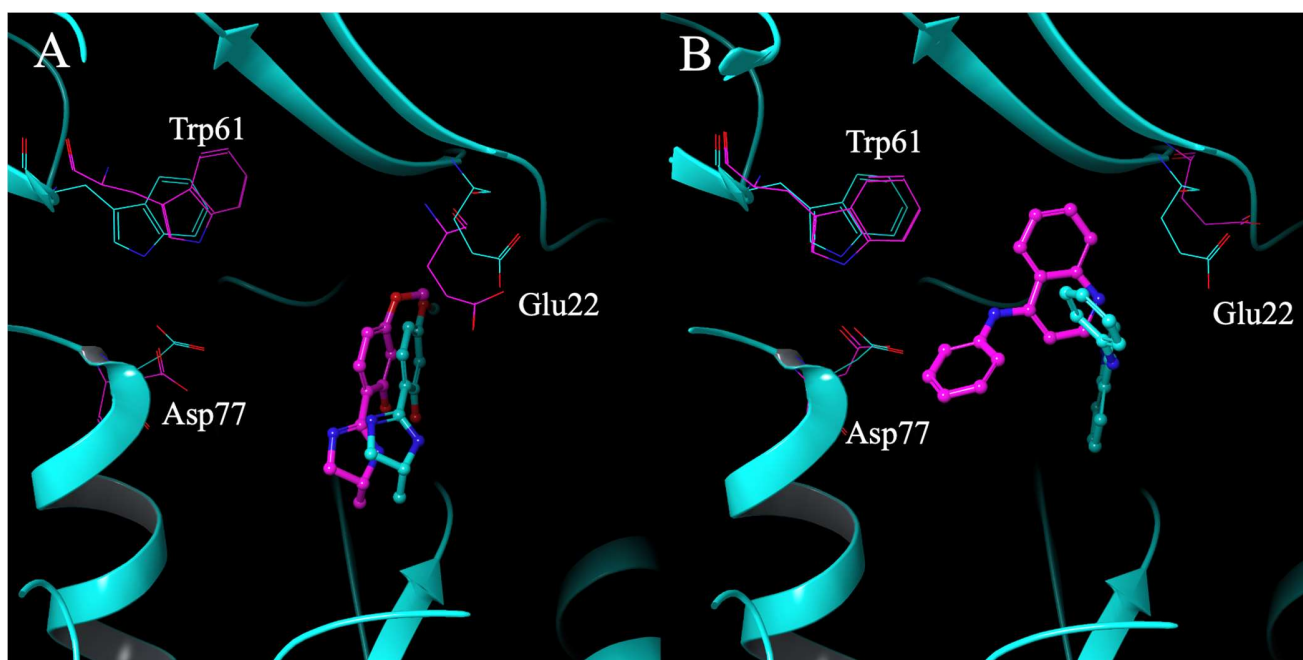

**Figure S3.** Prediction of structural changes in docking poses by MD simulation. A: Structure of compound **1** at 32 ns., B: Structure of compound **2** at 32 ns. Light blue structure shows the initial docking pose, the purple structure shows the structure after MD simulation.

The additional MD simulations for docking pose of compounds 1 and 2 were conducted using Desmond included in Maestro 2020-3 (Schrödinger, LLC). SpdSyn-compound 1 and 2 complex structures predicted by docking simulations were placed in an orthorhombic box with a buffer distance of 10 Å to create a hydration model, and the SPC water model was used for the hydration model. NaCl (0.15 M) served as the counter ion to neutralize the system. The cutoff radii for van der Waals and the time step, initial temperature, and pressure of the system were set to 9 Å, 2.0 fs, 300 K, and 1.01325 bar, respectively. The sampling interval during the simulation was set to 100 ps. Finally, we performed MD simulations using the NPT ensemble. All of these processes used the OPLS3e force field.
